# Supplementary material for: GJB2 and GJB6 Genetic Variant Curation in an Argentinean Non-Syndromic Hearing-Impaired Cohort
Source: MDPI journal article supplement (doi:10.3390/genes11101233), 2020-10-21
Supplement: s1 [file s1]

| #patient | Phenotype   |             | Familial/<br>Sporadic |
|----------|-------------|-------------|-----------------------|
|          | Onset       | HL severity |                       |
| 1        | Prelingual  | Profound    | Sporadic              |
| 2        | Prelingual  | Profound    | Sporadic              |
| 3        | Prelingual  | Profound    | Sporadic              |
| 4        | Prelingual  | Profound    | Sporadic              |
| 5        | Prelingual  | Profound    | Familial              |
| 6        | Prelingual  | Severe      | Familial              |
| 7        | Prelingual  | Profound    | Sporadic              |
| 8        | Prelingual  | Profound    | Familial              |
| 9        | Prelingual  | Profound    | Sporadic              |
| 10       | Prelingual  | Profound    | Sporadic              |
| 11       | Prelingual  | Profound    | Sporadic              |
| 12       | Prelingual  | Profound    | Sporadic              |
| 13       | Prelingual  | Profound    | Sporadic              |
| 14       | Prelingual  | Profound    | Sporadic              |
| 15       | Prelingual  | Profound    | Sporadic              |
| 16       | Postlingual | Moderate    | Sporadic              |
| 17       | Prelingual  | Profound    | Sporadic              |
| 18       | Prelingual  | Profound    | Sporadic              |
| 19       | Prelingual  | Profound    | Sporadic              |
| 20       | Prelingual  | Moderate    | Sporadic              |
| 21       | Prelingual  | Profound    | Familial              |
| 22       | Prelingual  | Profound    | Sporadic              |
| 23       | Prelingual  | Profound    | Sporadic              |
| 24       | Prelingual  | Profound    | Sporadic              |
| 25       | Prelingual  | Profound    | Sporadic              |
| 26       | Prelingual  | Severe      | Sporadic              |
| 27       | Prelingual  | Profound    | Sporadic              |
| 28       | Prelingual  | Profound    | Sporadic              |
| 29       | Prelingual  | Profound    | Familial              |
| 30       | Prelingual  | Profound    | Familial              |
| 31       | Prelingual  | Profound    | Sporadic              |
| 32       | Prelingual  | Profound    | Sporadic              |
| 33       | Prelingual  | Profound    | Sporadic              |
| 34       | Prelingual  | Moderate    | Sporadic              |
| 35       | Prelingual  | Moderate    | Sporadic              |
| 36       | Prelingual  | Severe      | Sporadic              |
| 37       | Prelingual  | Moderate    | Familial              |
| 38       | Prelingual  | Severe      | Sporadic              |
| 39       | Prelingual  | Moderate    | Sporadic              |
| 40       | Prelingual  | Profound    | Familial              |
| 41       | Prelingual  | Profound    | Sporadic              |
| 42       | Prelingual  | Profound    | Sporadic              |

|    |             |          |          |
|----|-------------|----------|----------|
| 43 | Prelingual  | Profound | Familial |
| 44 | Prelingual  | Profound | Sporadic |
| 45 | Prelingual  | Profound | Sporadic |
| 46 | Prelingual  | Profound | Sporadic |
| 47 | Prelingual  | Severe   | Sporadic |
| 48 | Prelingual  | Profound | Sporadic |
| 49 | Prelingual  | Profound | Sporadic |
| 50 | Prelingual  | Profound | Sporadic |
| 51 | Prelingual  | Profound | Sporadic |
| 52 | Prelingual  | Profound | Sporadic |
| 53 | Prelingual  | Profound | Sporadic |
| 54 | Prelingual  | Severe   | Familial |
| 55 | Prelingual  | Severe   | Sporadic |
| 56 | Prelingual  | Severe   | Familial |
| 57 | Postlingual | Moderate | Sporadic |
| 58 | Prelingual  | Profound | Sporadic |
| 59 | Prelingual  | Profound | Sporadic |
| 60 | Prelingual  | Severe   | Familial |
| 61 | Prelingual  | Profound | Familial |
| 62 | Prelingual  | Moderate | Familial |
| 63 | Prelingual  | Profound | Sporadic |
| 64 | Prelingual  | Profound | Sporadic |
| 65 | Prelingual  | Moderate | Familial |
| 66 | Prelingual  | Moderate | Sporadic |
| 67 | Prelingual  | Profound | Sporadic |
| 68 | Prelingual  | Moderate | Familial |
| 69 | Prelingual  | Profound | Familial |
| 70 | Prelingual  | Profound | Familial |
| 71 | Prelingual  | Moderate | Familial |
| 72 | Prelingual  | Severe   | Familial |
| 73 | Prelingual  | Profound | Sporadic |
| 74 | Prelingual  | Moderate | Sporadic |
| 75 | Prelingual  | Moderate | Sporadic |
| 76 | Postlingual | Moderate | Sporadic |
| 77 | Prelingual  | Profound | Sporadic |
| 78 | Prelingual  | Severe   | Sporadic |
| 79 | Prelingual  | Profound | Sporadic |
| 80 | Prelingual  | Profound | Sporadic |
| 81 | Prelingual  | Profound | Sporadic |
| 82 | Prelingual  | Profound | Sporadic |
| 83 | Postlingual | Moderate | Familial |
| 84 | Prelingual  | Profound | Sporadic |
| 85 | Prelingual  | Profound | Sporadic |
| 86 | Prelingual  | Profound | Sporadic |

|    |             |          |          |
|----|-------------|----------|----------|
| 87 | Postlingual | Profound | Familial |
| 88 | Postlingual | Moderate | Sporadic |
| 89 | Prelingual  | Profound | Sporadic |
| 90 | Prelingual  | Profound | Sporadic |
| 91 | Postlingual | Moderate | Sporadic |
| 92 | Prelingual  | Profound | Sporadic |
| 93 | Prelingual  | Profound | Familial |
| 94 | Prelingual  | Severe   | Sporadic |
| 95 | Prelingual  | Profound | Sporadic |
| 96 | Prelingual  | Moderate | Sporadic |
| 97 | Postlingual | Severe   | Sporadic |

| disease-causative genotype detected         | Family Segregation |
|---------------------------------------------|--------------------|
| c.35delG (;) 35delG                         | N/A                |
| c.35delG (;) 35delG                         | N/A                |
| p.(Glu47*) (;) del(GJB6-D13S1830)           | N/A                |
| c.35delG (;) p.Trp77Arg                     | N/A                |
| [GJB2:c.35delG] ; [GJB6:del(GJB6-D13S1830)] | yes                |
| c.35delG (;) p.Ile82Met                     | N/A                |
| p.Arg75Trp (;) p.Val27Ile                   | N/A                |
| c.[35delG] ; [35delG]                       | yes                |
| c.[35delG] ; [-23+1G>A]                     | yes                |
| c.[35delG] ; p.[Arg143Trp]                  | yes                |
| c.[35delG] ; [35delG]                       | yes                |
| c.[35delG] ; [35delG]                       | yes                |
| c.[35delG] ; [35delG]                       | yes                |
| GJB2:c.35delG (;) GJB6:del(GJB6-D13S1854)   | N/A                |
| c.35delG (;) 167delT                        | N/A                |
| p.Met34Thr (;) Met34Thr                     | N/A                |
| c.35delG (;) 35delG                         | N/A                |
| p.[(Glu47*)] ; [Gly109Val]                  | yes                |
| c.35delG (;) 35delG                         | N/A                |
| p.Val37Ile (;) c.167delT                    | N/A                |
| c.35delG (;) 35delG                         | N/A                |
| c.35delG (;) p.(Val190Asp)                  | N/A                |
| p.Arg75Gln / +                              | N/A                |
| c.[35delG] ; [35delG]                       | yes                |
| [GJB2:c.35delG] ; [GJB6:del(GJB6-D13S1854)] | yes                |
| c.35delG (;) 35delG                         | N/A                |
| c.35delG (;) 167delT                        | N/A                |
| p.[Arg143Trp] ; c.[167delT]                 | yes                |
| c.35delG (;) 35delG                         | N/A                |
| 35delG(; ) 167delT                          | N/A                |
| c.35delG (;) 35delG                         | N/A                |
| GJB2:c.35delG (;) GJB6:del(GJB6-D13S1830)   | N/A                |
| c.35delG (;) 35delG                         | N/A                |
| c.[313_326del14] ; p.[Glu120del]            | yes                |
| p.Val37Ile (;) (Glu47*)                     | N/A                |
| p.Ile20Thr (;) Ile20Thr                     | N/A                |
| c.35delG (;) p.Met34Thr                     | N/A                |
| 35delG (;) 167delT                          | N/A                |
| p.Met34Thr (;) Met34Thr                     | N/A                |
| [GJB2:c.35delG] ; [GJB6:del(GJB6-D13S1830)] | yes                |
| del(GJB6-D13S1830) (;) del(GJB6-D13S1854)   | N/A                |
| c.35delG (;) 35delG                         | N/A                |

|                                             |     |
|---------------------------------------------|-----|
| c.[35delG] ; [35delG]                       | yes |
| [GJB2:c.35delG] ; [GJB6:del(GJB6-D13S1854)] | yes |
| c.35delG (;) p.(Glu47*)                     | N/A |
| del(GJB6-D13S1830);del(GJB6-D13S1830)       | yes |
| c.35delG (;) -23+1 G>A                      | N/A |
| c.[35delG] ; [35delG]                       | yes |
| c.35delG (;) p.Arg184Pro                    | N/A |
| c.35delG (;) 35delG                         | N/A |
| c.[35delG] ; [167delT]                      | yes |
| c.35delG (;) 35delG                         | N/A |
| c.35delG (;) 35delG                         | N/A |
| p.Ile20Thr (;) Ile20Thr                     | N/A |
| c.[35delG] ; p.[Asn206Ser]                  | yes |
| c.35delG (;) 35delG                         | N/A |
| c.[35delG] ; [-22-2A>C]                     | yes |
| c.[35delG] ; [167delT]                      | yes |
| c.35delG (;) 35delG                         | N/A |
| c.[35delG] ; [269dup]                       | yes |
| c.35delG (;) 35delG                         | N/A |
| p.[(Val95Met)] ; [Gly12Val]                 | yes |
| c.[35delG] ; p.[Arg184Pro]                  | yes |
| c.[35delG] ; [35delG]                       | yes |
| c.[35delG] ; [35delG]                       | yes |
| c.35delG (;) p.Arg184Pro                    | N/A |
| [GJB2:c.35delG] ; [GJB6:del(GJB6-D13S1854)] | yes |
| c.[35delG] ; p.[Val37Ile]                   | yes |
| c.35delG (;) 167delT                        | N/A |
| c.[35delG] ; [35delG]                       | yes |
| c.[35delG] ; [35delG]                       | yes |
| c.[35delG] ; p.[Arg143Trp]                  | yes |
| c.35delG (;) p.Arg143Trp                    | N/A |
| c.35delG (;) 35delG                         | N/A |
| p.Val84Leu (;) c.313_326del14               | N/A |
| p.Val37Ile (;) del(GJB6-D13S1830)           | N/A |
| p.[Arg143Trp] ; c.[232dupG]                 | yes |
| c.[167delT] ; p.[Arg184Pro]                 | yes |
| c.35delG (;) 35delG                         | N/A |
| c.35delG (;) 35delG                         | N/A |
| [GJB2:c.35delG] ; [GJB6:del(GJB6-D13S1830)] | yes |
| c.35delG (;) 35delG                         | N/A |
| p.Met34Thr (;) Ser19Thr                     | N/A |
| c.35delG (;) p.(Glu47*)                     | N/A |
| GJB2:c.35delG (;) GJB6:del(GJB6-D13S1830)   | N/A |
| p.Val37Ile (;) Gly12Val                     | N/A |

|                                    |     |
|------------------------------------|-----|
| p.[Asn206Ser] ; [Asn206Ser]        | yes |
| p.Met34Thr (;) Met34Thr            | N/A |
| c.35delG (;) p.Val95Met            | N/A |
| p.(Glu47*) (;) Glu120del           | N/A |
| p.[Cys211Tyr] ; del(GJB6-D13S1830) | yes |
| p.Asn206Ser (;) del(GJB6-D13S1830) | N/A |
| c.167delT (;) 167delT              | N/A |
| c.35delG (;) 35delG                | N/A |
| c.35delG(; ) 167delT               | N/A |
| p.Val37Ile (;) c.167delT           | N/A |
| c.35delG (;) p.Leu90Pro            | N/A |
